# Supplementary material for: Graphene oxide reduced and modified by soft nanoparticles and its catalysis of the Knoevenagel condensation
Source: Royal Society of Chemistry journal article supplement (doi:10.1039/c2jm15311d), 2012-01-01
Supplement: c2jm15311d.pdf [file c2jm15311d.pdf]

## Electronic Supplementary Information (ESI)

### Graphene Oxide Reduced and Modified by Soft Nanoparticles and its Catalysis of the Knoevenagel Condensation

Tao Wu<sup>1</sup> Xingrui Wang<sup>1</sup> Haixia Qiu<sup>1</sup> Jianping Gao<sup>1\*</sup> Wei Wang<sup>2</sup> Yu Liu<sup>1\*</sup>

(<sup>1</sup>School of Science, <sup>2</sup>School of Chemical Engineering and Technology,

Tianjin University, Tianjin 300072, P R China)

Fax: +86 22 274 034 75; Tel: 022-27403475; E-mail: [liuyu2010@hotmail.com](mailto:liuyu2010@hotmail.com)

#### 1 Preparation of GO suspension and GO-PAMAM blend

A GO suspension was prepared from purified natural graphite by a modified Hummers method.<sup>1,2</sup> Briefly, concentrated H<sub>2</sub>SO<sub>4</sub> was added to a 250-mL flask filled with graphite, followed by the addition of NaNO<sub>3</sub>, and then solid KMnO<sub>4</sub> was gradually added with stirring while the temperature of the mixture was kept below 20 °C. Next the temperature was increased to 30 °C, and excess distilled water was added to the mixture and then the temperature was increased to 80 °C. Finally, 30% H<sub>2</sub>O<sub>2</sub> was added until the color of mixture changed to brilliant yellow. The mixture was filtered and washed several times with 5% aqueous HCl to remove metal ions and then washed with distilled water to remove the acid. The resulting filter cake was dried in air and then re-dispersed into water. Suspended GO sheets were obtained after ultrasonic treatment.

The GO suspension (0.3 g/L) and the G3 PAMAM solution (0.3 g/L) were mixed and sonicated for 10 min and then allowed to stand for 12 h for adsorption. The GO-PAMAM blend was obtained by centrifuging the above mixture.

## 2 Preparation of rGO and rGO-PAMAM blend

The rGO was prepared by thermal reduction. In short, the prepared GO powder was placed in an oven and heated at 180 °C for 12 h. The rGO-PAMAM blend was prepared by the following method. The rGO powder was added to a G3 PAMAM solution (0.3 g/L) and the mixture was sonicated for 30 min to obtain a stable suspension and then allowed to stand for 12 h for adsorption. The rGO-PAMAM blend was obtained by centrifuging the above suspension.

## 3 Raman spectrum of pure G3 PAMAM

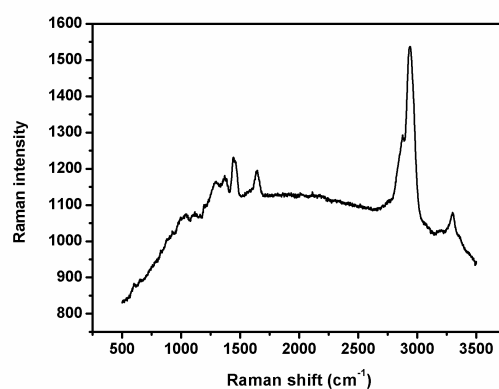

Figure S1. Raman spectrum of pure G3 PAMAM

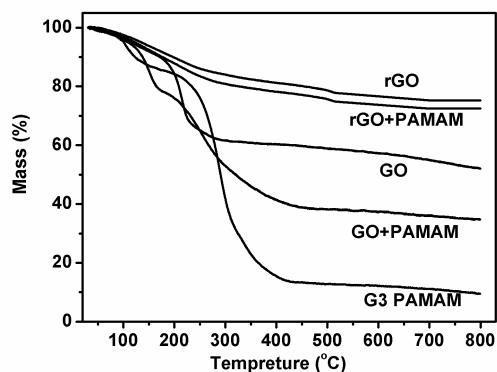

Figure S2. TGA curves of pure G3 PAMAM, rGO, GO-G3 PAMAM blend and  
rGO-G3 PAMAM blend

**Reference:**

S1 W. Hummers, R. Offeman, J Am Chem Soc., 1958; 80, 1339-1340.

S2 N.N. Zhang, H.X. Qiu, Y.M. Si, W.Wang , J.P. Gao., Carbon, 2011,494, 827-837.
